# Supplementary material for: Mutations on non-structural proteins of SARS-CoV-2 are possibly responsible for adverse clinical outcomes
Source: bioRxiv or medRxiv preprint supplement (doi:10.1101/2021.10.19.21265062), 2021-10-27
Supplement: Supplementary file [file media-1.pdf]

Table S1. Non-synonymous mutations for characterizing the variants.

|         | ORF1a                                          | ORF1b                     | S                                        |                                             | ORF3a        | M    | ORF7a | ORF8                 | N                                |
|---------|------------------------------------------------|---------------------------|------------------------------------------|---------------------------------------------|--------------|------|-------|----------------------|----------------------------------|
| Alpha   | T1001I<br>A1708D<br>I2230T                     | P314L                     | N501Y<br>A570D<br>D614G<br>P681H         | T716I<br>S982A<br>D1118H                    |              |      |       | Q27*<br>R52I<br>Y73C | (D3L)<br>R203K<br>G204R<br>S235F |
| Beta    | T265I<br>K3353R                                | P314L                     | E484K<br>N501Y<br>D614G                  |                                             | Q57H         |      |       |                      | T205I                            |
| Gamma   | S1188L<br>K1795Q                               | P314L<br>E1264D           | L18F<br>T20N<br>P26S<br>D138Y<br>E484K   | N501Y<br>D614G<br>H655Y<br>T1027I<br>V1176F | S253P        |      |       | E92K                 | P80R<br>R203K<br>G204R           |
| Delta   | P2287S<br>T3255I<br>T3646A                     | P314L<br>G662S<br>P1000L  | T19R<br>L452R<br>T478K                   | D614G<br>P681R<br>D950N                     | S26L         | I82T | T120I |                      | D63G<br>R203M<br>D377Y           |
| Epsilon | T265I                                          | P314L                     | L452R<br>D614G                           |                                             | Q57H         |      |       |                      | T205I                            |
| Zeta    | L3468V<br>L3930F                               | P314L                     | E484K<br>D614G<br>V1176F                 |                                             |              |      |       |                      | A119S<br>R203K<br>G204R<br>M234I |
| Eta     | T2007I                                         | (P314F)                   | A67V<br>E484K<br>D614G                   | Q677H<br>F888L                              |              | I82T |       |                      | T205I                            |
| Theta   | L3201P<br>D3681E<br>L3930F                     | P314L<br>A1291V           | E484K<br>N501Y<br>D614G<br>P681H         | E1092K<br>H1101Y<br>V1176F                  |              |      |       |                      | R203K<br>G204R                   |
| Iota    | T265I<br>L3201P                                | P314L                     | D614G                                    |                                             | P42L<br>Q57H |      |       | T11I                 | M234I                            |
| Kappa   | T1567I<br>T3646A                               | P314L<br>M1352I           | L452R<br>D614G<br>P681R                  |                                             | S26L         |      |       |                      | R203M<br>D377Y                   |
| Lambda  | T1246I<br>P2287S<br>F2387V<br>L3201P<br>T3255I | P314L                     | T76I<br>L452Q<br>F490S<br>D614G<br>T859N |                                             |              |      |       |                      | P13L<br>R203K<br>G204R<br>G214C  |
| D614G   |                                                | P314L                     | D614G                                    |                                             |              |      |       |                      |                                  |
| D614G+  |                                                | P314L                     | D614G                                    |                                             |              |      |       |                      | R203K<br>G204R                   |
| Japan   |                                                | P314L<br>P1567L<br>R2684I | D614G                                    |                                             |              |      |       |                      | R203K<br>G204R<br>M234I          |

Table S2. Characteristics and treatment of deceased patients

| Patient No. | Sex    | Age | Duration of hospitalization | Obesity | Current or ex-Smoker | Comorbidity               | Treatment      |
|-------------|--------|-----|-----------------------------|---------|----------------------|---------------------------|----------------|
| Group A     |        |     |                             |         |                      |                           |                |
| 1           | Male   | 70s | 3                           | No      | Yes                  | COPD, Cancer              | DEX, RDV       |
| 2           | Female | 70s | 19                          | No      | No                   | HTN                       | DEX, mPSL      |
| 3           | Female | 80s | 28                          | No      | No                   | HTN, CVD                  | DEX, mPSL, RDV |
| 4           | Male   | 80s | 6                           | No      | No                   | HTN, COPD, Cancer         | DEX            |
| Group B     |        |     |                             |         |                      |                           |                |
| 1           | Male   | 70s | 21                          | No      | No                   | HTN, COPD, CKD            | mPSL, RDV      |
| 2           | Female | 70s | 10                          | Yes     | Yes                  | HTN, DLP, COPD, CKD       | mPSL           |
| 3           | Male   | 70s | 26                          | Yes     | No                   | HTN, DLP, DM              | DEX, mPSL      |
| 4           | Male   | 70s | 21                          | No      | Yes                  | HTN, DM, CVD              | DEX, mPSL      |
| 5           | Male   | 80s | 5                           | No      | Yes                  | DM, COPD                  | mPSL           |
| 6           | Male   | 80s | 16                          | No      | Yes                  | HTN, DM, CVD, CKD, Cancer | DEX, mPSL      |

COPD: chronic obstructive pulmonary disease, HTN: hypertension, CVD: cardiovascular disease, DLP: dyslipidemia, DM: diabetes mellitus, DEX: dexamethasone, RDV: remdesivir, mPSL: methylprednisolone
